# Supplementary material for: Deep UV excited muscle cell autofluorescence varies with the fibre type
Source: Royal Society of Chemistry journal article supplement (doi:10.1039/c5an00172b), 2015-01-01

Line plot of all the spectral acquisitions made in the central part of the EDL muscle

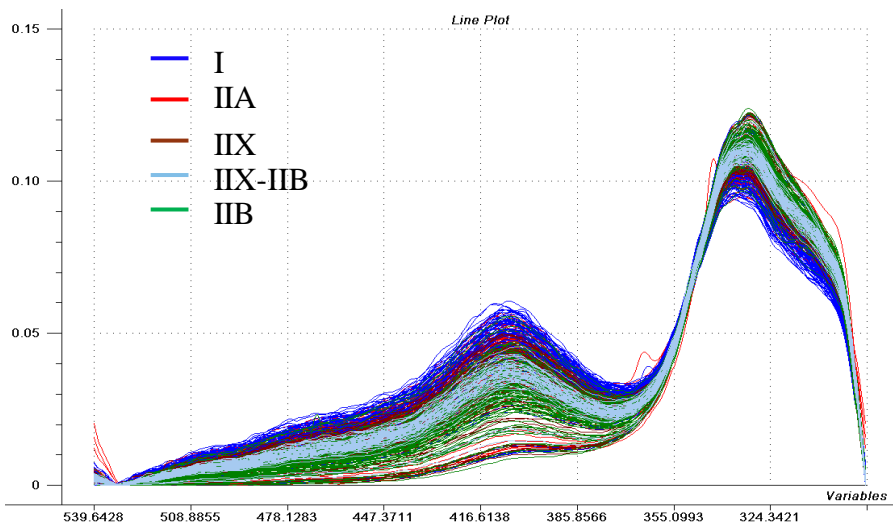

Line plot of the spectral acquisitions made in the central part of the soleus muscle

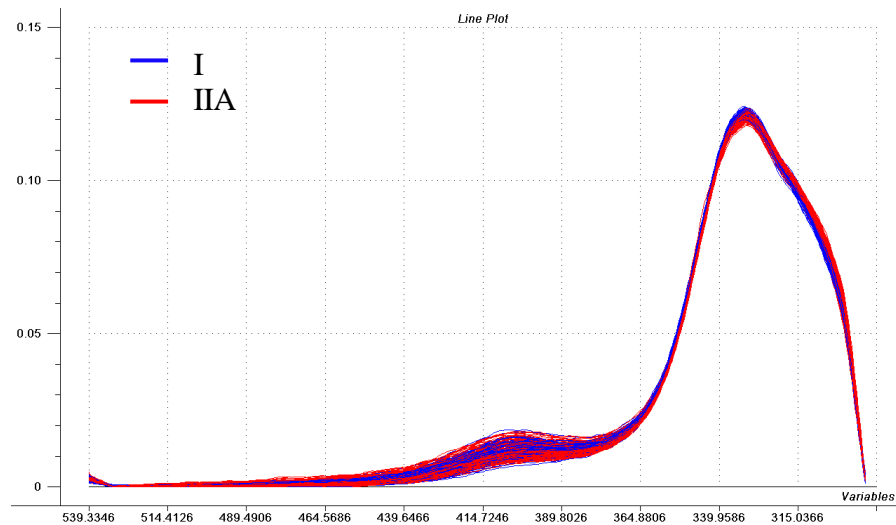

Line plot of the spectral acquisitions made in the central part of one single cell type IIX-IIB of the EDL muscle

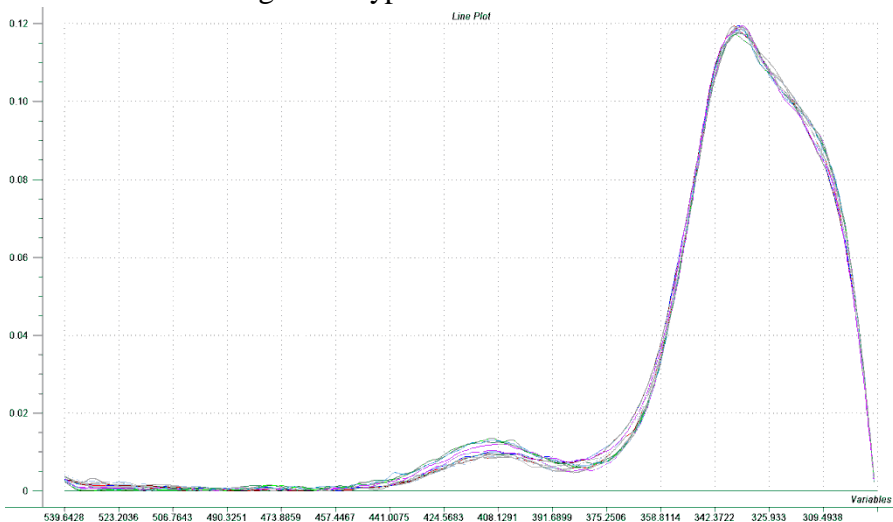

Line plot of the spectral acquisitions made in the central part of one single cell type I of the soleus muscle

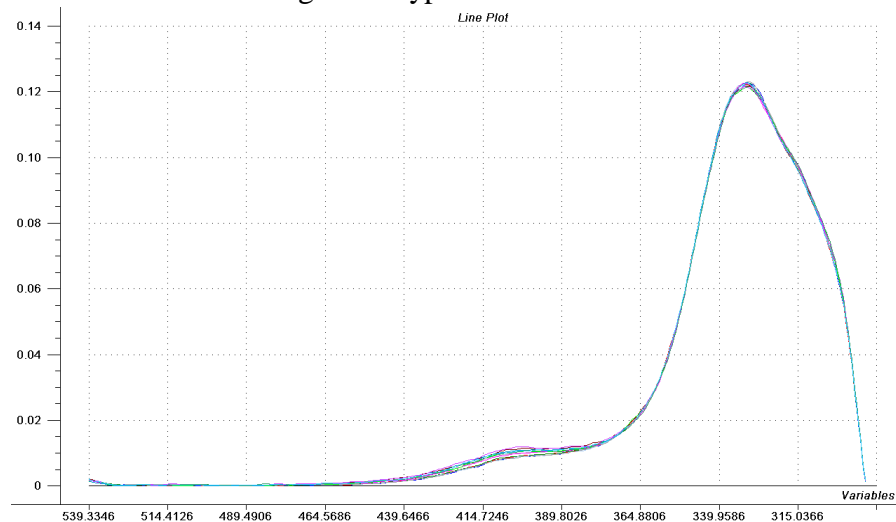

Supplement: c5an00172b1.pdf [file c5an00172b1.pdf]
